# Supplementary material for: Tissue- and Species-Specific Patterns of RNA metabolism in Post-Mortem Mammalian Retina and Retinal Pigment Epithelium
Source: PubMed Central journal article supplement (PMC6794289; doi:10.1038/s41598-019-51379-3), 2019-10-15
Supplement: 41598_2019_51379_MOESM1_ESM.pdf [file 41598_2019_51379_MOESM1_ESM.pdf]

1 **SUPPLEMENTARY INFORMATION**

2  
3  
4 **Tissue- and Species-Specific Patterns of RNA metabolism in Post-Mortem Mammalian**  
5 **Retina and Retinal Pigment Epithelium**  
6  
7

8 Les Kallestad<sup>1\*</sup>, Seth Blackshaw<sup>2</sup>, Ahmad M. Khalil<sup>3</sup>, and Krzysztof Palczewski<sup>1\*</sup>  
9  
10

11 <sup>1</sup>Gavin Herbert Eye Institute and the Department of Ophthalmology, University of California-  
12 Irvine, Irvine, CA 92657

13 <sup>2</sup>Department of Neuroscience, Johns Hopkins University, Baltimore, MD 21218

14 <sup>3</sup>Department of Genetics and Genome Sciences, Case Western Reserve University, Cleveland,  
15 OH 44106  
16  
17

18 **Table S1.** Number of genes expressed by tissue type and biotype.

| <b>Mouse</b>               | <b>All<br/>Transcripts</b> | <b>Protein<br/>Coding</b> | <b>lncRNA</b> | <b>Pseudogene</b> |
|----------------------------|----------------------------|---------------------------|---------------|-------------------|
| retina                     | 14608                      | 13159                     | 728           | 196               |
| RPE/choroid                | 14502                      | 13558                     | 478           | 183               |
| common                     | 13089                      | 12381                     | 353           | 113               |
| exclusively retina         | 1519                       | 778                       | 376           | 83                |
| exclusively<br>RPE/choroid | 1413                       | 1177                      | 125           | 79                |
| <b>Baboon</b>              |                            |                           |               |                   |
| retina                     | 13771                      | 13530                     | 66            | 110               |
| RPE/choroid                | 15040                      | 14730                     | 82            | 128               |
| common                     | 13630                      | 13399                     | 60            | 110               |
| exclusively retina         | 140                        | 131                       | 6             | 0                 |
| exclusively<br>RPE/choroid | 1409                       | 1331                      | 22            | 18                |

19

20

21

22 **Table S2.** Number of genes by biotype at 24 h PMI.

| <b>Mouse retina</b>       | <b>Expressed</b> | <b>Preserved</b> | <b>Degraded</b> |
|---------------------------|------------------|------------------|-----------------|
| all genes                 | 14750            | 1125             | 1033            |
| protein coding            | 13664            | 1088             | 1011            |
| pseudogene                | 243              | 15               | 7               |
| lncRNA                    | 843              | 22               | 15              |
| <b>Mouse RPE/choroid</b>  |                  |                  |                 |
| all genes                 | 15041            | 4608             | 4709            |
| protein coding            | 14069            | 4118             | 4549            |
| pseudogene                | 255              | 93               | 32              |
| lncRNA                    | 717              | 397              | 128             |
| <b>Baboon retina</b>      |                  |                  |                 |
| all genes                 | 14709            | 4177             | 4802            |
| protein coding            | 14481            | 4102             | 4746            |
| pseudogene                | 127              | 40               | 32              |
| lncRNA                    | 101              | 35               | 24              |
| <b>Baboon RPE/choroid</b> |                  |                  |                 |

*Tissue- and Species-Specific Patterns of RNA instability in Post-Mortem Mammalian Retina and RPE*

|                |       |      |      |
|----------------|-------|------|------|
| all genes      | 15501 | 4036 | 4469 |
| protein coding | 15267 | 3983 | 4401 |
| pseudogene     | 135   | 35   | 30   |
| lncRNA         | 99    | 18   | 38   |

24 **Table S3.** Genes and primer sequences used in multiple linear regression modeling.

25

| <b>Gene</b> | <b>Primer Sequence</b>    |
|-------------|---------------------------|
| Pex19 F     | GAAGACGACCGGGAAGTGG       |
| Pex19 R     | CGAAGAGAGCATCTTTGGCAGTA   |
| Arhgap12 F  | TCAAAGCATCAAGATCCAGGTCA   |
| Arhgap12 R  | TGCCCAAGAAGACAACCAGT      |
| Coq9 F      | CTACATTGAGCACTGGCCCC      |
| Coq9 R      | TGTACCAGTTAAAGTCAGTGGAC   |
| Got2 F      | AAAAGCGGCCGGTTCGTC        |
| Got2 R      | GGCAGAAAGACATCTCGGCT      |
| Usp30 F     | ATGGCAGATCTCGTCCTTTGA     |
| Usp30 R     | CTGACTGCTGCTCCAGGGAAT     |
| Trappc3 F   | TGGCACGGAGAGCAAGAAAAT     |
| Trappc3 R   | TGTTGTAGCCCATTCTGTCCAGC   |
| Srp14 F     | GTGTCTGTTGAGAGCCACGG      |
| Srp14 R     | TCAGTAGATTTGAATAGGCCATCTG |
| Tbc1d20 F   | CACCACCTCAGGGATTTTCATGG   |
| Tbc1d20 R   | CAAAGATGGTCCCCACCTCAG     |
| Ppp4r2 F    | AGCTGCGTTTGTCCATCCTC      |
| Ppp4r2 R    | GGCCCGTTTATATTAGACCTGTCA  |
| Dis3l2 F    | AGGCTTGAAGAGAGGAACACT     |
| Dis3l2 R    | CCCGATCACCATCCGGAGAA      |
| Fxr2 F      | TTATTCTGTCAACCACAGAAGCCC  |
| Fxr2 R      | CTGCTGCCAGCTGCTTACTT      |
| Chd8 F      | AGCTAAACACCATCACTCCTG     |
| Chd8 R      | TTGGCGGTTTGAACGTCTCT      |
| Brd7 F      | ATTGGACACAGCAAAGAAGCAG    |
| Brd7 R      | ACACCTCAGCCTCTTCGGAGT     |

*Tissue- and Species-Specific Patterns of RNA instability in Post-Mortem Mammalian Retina and RPE*

|            |                           |
|------------|---------------------------|
| Med23 F    | ATAAGCAGACCTTGAACATTGC    |
| Med23 R    | AATGAGCTGGCTGGAAAGGT      |
| Ppp2r2d F  | GCGGAAGAACTGTCAACTGGG     |
| Ppp2r2d R  | TCAACGGTGGAGATGATGTCG     |
| Psmc4 F    | GTACAAGCAGATTGGCATCG      |
| Psmc4 R    | CCCACCACACGGATAAATGC      |
| Uba2 F     | CACTGGCTTCTCCCACATCG      |
| Uba2 R     | TCTTTGGCAACCTGAGCCTTT     |
| Dctn3 F    | GCTGGACAGCGCTTCTATCAA     |
| Dctn3 R    | AGCATTGTAGTCTTGTTATACCCTT |
| Rab3gap1 F | AGCCTCCAGATATAGATGCCCT    |
| Rab3gap1 R | AAATGAGGCCACGTTGTTGC      |
| Kpna6 F    | AGAGCTTCTGATGCACAACGAT    |
| Kpna6 R    | GCAAGGGAGGGCTGAACAAT      |
| Mkrn2 F    | CCAAGCAGTTTGAAAACCCAA     |
| Mkrn2 R    | CTTCTTCCCCATTCCCTGTTTGA   |
| Arhgap35 F | ACATCGAAGCCACAGGACTAA     |
| Arhgap35 R | AAGTCTTTCTCTGCCAGGTCC     |
| Btbd1 F    | CGATCGCATCAGGTTACAGTTA    |
| Btbd1 R    | TCCAGTATCATTCTGTCCCAAGG   |
| Pias4 F    | ATTGGGGTGAAGCATCCTGAG     |
| Pias4 R    | TTCACCAGTGGGCAGATGAGG     |
| Got2 F     | AAAAGCGGCCGGTTCGTC        |
| Got2 R     | GGCAGAAAGACATCTCGGCT      |
| Rnf185 F   | TCTTCTGTTGGCCGTGTTTAC     |
| Rnf185 R   | ACTTTGTCTCGGCTGATGCC      |
| Pdrg1 F    | TGCCTCACCCCTAAGACGAAG     |
| Pdrg1 R    | CGGTTTTCTTGGGCTTCAA       |
| Kdm1a F    | AAGCCAGGGATCGAGTAGGT      |

*Tissue- and Species-Specific Patterns of RNA instability in Post-Mortem Mammalian Retina and RPE*

|           |                          |
|-----------|--------------------------|
| Kdm1a R   | CTGACGACAGCCATGGGATT     |
| Hnrnpd F  | GGATGAAGGCCATTCAAACCTCC  |
| Hnrnpd R  | GTCCCAGCTAAGGCCTCCTA     |
| Pex5 F    | GTCCCAAGAATTCATCGCCG     |
| Pex5 R    | TCATCGTACCATCGATCAGC     |
| Trim41 F  | ATAGTGTGGTGCCATTGGAGG    |
| Trim41 R  | TCTGGCTCTTCAGCTCTGTAC    |
| Psme4 F   | AAGATGAACGAACTCAGGGCA    |
| Psme4 R   | ATTTTCCACTGGAGCGATCTTA   |
| Atp5h F   | GGGGGTCCGGTGAAGTATCC     |
| Atp5h R   | TCCACCAGGGCTGTGTATTT     |
| Zmynd11 F | GCTGTTGACGTCCCTACCAT     |
| Zmynd11 R | CTGCTCACTGTCTGCTCCAT     |
| Fam50a F  | AGCAGCGTGAGCAAATGGA      |
| Fam50a R  | TTCAGAGTCACAAGACCCACAGTA |

**Table S4.** Internally normalized qRT-PCR Ct values for mouse retina.

|               | Rab3gap1 | Kpna6  | Mkrn2  | Arhgap35 | Btbd1  | Pias4  | Got2    | Rnf185 | Pdrg1  |
|---------------|----------|--------|--------|----------|--------|--------|---------|--------|--------|
| Retina 0 h-1  | -0.231   | -0.13  | 0.921  | -0.654   | -1.266 | 1.903  | -1.622  | 1.031  | 0.524  |
| Retina 0 h-2  | -0.211   | 0.032  | 0.814  | -0.651   | -1.433 | 1.959  | -1.775  | 1.106  | 0.406  |
| Retina 0 h-3  | -0.149   | 0.058  | 1.017  | -0.449   | -1.357 | 1.905  | -1.485  | 1.151  | 0.185  |
| Retina 0 h-4  | -0.086   | -0.047 | 1.109  | -0.573   | -1.167 | 1.919  | -1.562  | 1.061  | 0.375  |
| Retina 6 h-1  | -0.095   | 0.229  | 1.279  | -0.602   | -1.413 | 2.332  | -1.588  | 1.234  | 0.134  |
| Retina 6 h-2  | -0.073   | 0.577  | 1.136  | -0.658   | -1.65  | 2.634  | -1.592  | 1.226  | 0.27   |
| Retina 6 h-3  | 0.017    | 0.457  | 1.127  | -0.519   | -1.342 | 2.276  | -1.464  | 1.022  | 0.045  |
| Retina 6 h-4  | -0.105   | 0.108  | 1.312  | -0.728   | -1.377 | 2.081  | -1.726  | 0.67   | 2.276  |
| Retina 12 h-2 | -0.752   | 0.561  | 1.814  | -1.832   | -2.307 | 1.454  | -1.984  | 0.467  | -0.205 |
| Retina 12 h-3 | -0.68    | 0.705  | 1.896  | -1.915   | -2.255 | 1.42   | -2.012  | 0.4    | -0.017 |
| Retina 12 h-4 | -0.731   | 0.676  | 1.876  | -2.146   | -2.185 | 1.219  | -2.135  | 0.071  | -0.236 |
| Retina 18 h-1 | 0.005    | 0.25   | 1.68   | -0.672   | -1.052 | 2.198  | -1.547  | 0.849  | 0.341  |
| Retina 18 h-2 | -0.048   | 0.355  | 1.691  | -0.614   | -0.989 | 2.032  | -1.68   | 0.998  | 0.456  |
| Retina 18 h-3 | 0.063    | 0.395  | 1.606  | -0.64    | -0.956 | 2.032  | -1.731  | 0.722  | 0.23   |
| Retina 18 h-4 | 0.146    | 0.217  | 1.764  | -0.695   | -0.917 | 1.93   | -1.768  | 0.565  | 0.444  |
| Retina 24 h-1 | -0.306   | 0.245  | 0.95   | -0.781   | -1.133 | 1.836  | -1.545  | 1.028  | 0.699  |
| Retina 24 h-2 | -0.245   | 0.155  | 1.378  | -0.847   | -0.998 | 1.794  | -1.696  | 1.093  | 0.682  |
| Retina 24 h-3 | -0.35    | 0.133  | 1.356  | -1.072   | -1.046 | 1.952  | -1.663  | 1.239  | 0.792  |
| Retina 24 h-4 | -0.406   | -0.074 | 0.954  | -1.18    | -1.088 | 1.42   | -1.958  | 0.762  | 0.781  |
|               | Kdm1a    | Hnrnpd | Pex5   | Trim41   | Psme4  | Atp5h  | Zmynd11 | Fam50a |        |
| Retina 0 h-1  | -0.049   | -0.44  | 1.512  | 1.564    | 0.589  | -3.839 | -0.769  | 0.963  |        |
| Retina 0 h-2  | -0.073   | -0.349 | 1.591  | 1.592    | 0.682  | -3.854 | -0.812  | 0.977  |        |
| Retina 0 h-3  | -0.194   | -0.57  | 1.464  | 1.525    | 0.512  | -3.97  | -0.597  | 0.955  |        |
| Retina 0 h-4  | -0.11    | -1.025 | 1.421  | 1.439    | 0.416  | -3.695 | -0.558  | 1.087  |        |
| Retina 6 h-1  | -0.392   | -0.489 | 1.675  | 1.739    | 0.179  | -4.049 | -0.884  | 0.713  |        |
| Retina 6 h-2  | -0.471   | -0.643 | 1.858  | 1.492    | 0.061  | -3.889 | -0.979  | 0.7    |        |
| Retina 6 h-3  | -0.268   | -0.491 | 1.906  | 1.603    | 0.087  | -4.13  | -0.962  | 0.637  |        |
| Retina 6 h-4  | -0.527   | -0.778 | 1.315  | 1.141    | 0.405  | -3.712 | -1.147  | 0.793  |        |
| Retina 12 h-2 | -0.155   | -1.451 | 0.276  | 1.027    | 1.922  | -3.144 | -1.52   | 5.822  |        |
| Retina 12 h-3 | -0.297   | -1.415 | 0.236  | 0.883    | 1.932  | -3.142 | -1.534  | 5.781  |        |
| Retina 12 h-4 | -0.181   | -1.37  | -0.082 | 0.532    | 2.522  | -3.091 | -1.608  | 6.865  |        |
| Retina 18 h-1 | -0.408   | -0.723 | 1.409  | 1.263    | 0.175  | -3.677 | -0.994  | 0.903  |        |
| Retina 18 h-2 | -0.443   | -0.782 | 1.349  | 1.195    | 0.243  | -3.709 | -0.993  | 0.939  |        |
| Retina 18 h-3 | -0.212   | -0.602 | 1.38   | 1.387    | 0.282  | -3.996 | -0.909  | 0.948  |        |
| Retina 18 h-4 | -0.418   | -0.723 | 1.303  | 1.175    | 0.43   | -3.801 | -0.848  | 1.194  |        |
| Retina 24 h-1 | -0.096   | -0.43  | 1.49   | 1.434    | 0.07   | -3.361 | -0.803  | 0.695  |        |
| Retina 24 h-2 | -0.255   | -0.61  | 1.025  | 1.342    | 0.235  | -3.492 | -0.566  | 1.01   |        |
| Retina 24 h-3 | -0.272   | -0.535 | 1.07   | 1.309    | 0.133  | -3.238 | -0.814  | 1.008  |        |
| Retina 24 h-4 | -0.407   | -0.622 | 1.022  | 0.904    | 0.401  | -3.294 | -0.896  | 0.82   |        |



29 **Table S5.** Internally normalized qRT-PCR Ct values for mouse RPE.

|            | Pex19  | Arhgap12 | Coq9   | Got2   | Usp30 | Trappc3 | Srp14  | Tbc1d20 | Ppp4r2 |
|------------|--------|----------|--------|--------|-------|---------|--------|---------|--------|
| RPE 0 h-1  | -1.370 | 1.348    | -1.122 | -2.281 | 1.010 | -0.144  | -2.246 | 0.308   | -0.497 |
| RPE 0 h-3  | -1.432 | 1.700    | -0.815 | -2.467 | 0.830 | -0.278  | -2.045 | 0.279   | -0.350 |
| RPE 0 h-4  | -1.504 | 1.874    | -0.911 | -2.614 | 0.944 | -0.211  | -2.068 | 0.229   | -0.606 |
| RPE 6 h-1  | -1.371 | 1.846    | -0.179 | -1.923 | 1.617 | 0.213   | -2.405 | 0.495   | -0.633 |
| RPE 6 h-2  | -1.096 | 2.184    | 0.101  | -2.056 | 1.579 | 0.361   | -2.133 | 0.560   | -0.634 |
| RPE 6 h-3  | -1.175 | 2.136    | 0.031  | -2.012 | 1.525 | 0.400   | -2.146 | 0.440   | -0.463 |
| RPE 6 h-4  | -1.340 | 1.986    | -0.227 | -2.146 | 1.480 | 0.324   | -2.246 | 0.390   | -0.631 |
| RPE 12 h-2 | -1.187 | 2.015    | 0.074  | -1.789 | 1.454 | 0.306   | -1.790 | 0.313   | -0.766 |
| RPE 12 h-3 | -1.280 | 2.037    | -0.109 | -1.933 | 1.371 | 0.243   | -1.802 | 0.162   | -0.681 |
| RPE 12 h-4 | -1.289 | 1.750    | -0.016 | -1.474 | 1.838 | 0.299   | -1.955 | 0.573   | -0.905 |
| RPE 18 h-1 | -1.070 | 2.250    | 0.084  | -1.911 | 1.550 | 0.581   | -2.330 | 0.603   | -0.482 |
| RPE 18 h-2 | -1.041 | 2.282    | 0.014  | -1.917 | 1.619 | 0.235   | -1.880 | 0.630   | -0.627 |
| RPE 18 h-3 | -1.076 | 2.234    | 0.184  | -1.938 | 1.611 | 0.504   | -1.999 | 0.495   | -0.535 |
| RPE 18 h-4 | -1.179 | 2.423    | 0.339  | -2.116 | 1.680 | 0.706   | -1.682 | 0.538   | -0.556 |
| RPE 24 h-1 | -0.741 | 2.329    | -0.223 | -1.933 | 1.664 | 0.306   | -2.030 | 0.754   | -0.606 |
| RPE 24 h-2 | -0.889 | 2.583    | 0.174  | -2.165 | 1.669 | 0.063   | -2.434 | 0.878   | -0.066 |
| RPE 24 h-3 | -0.869 | 2.763    | -0.029 | -2.171 | 1.761 | 0.474   | -2.184 | 0.822   | -0.131 |
|            | Dis3l2 | Fxr2     | Chd8   | Brd7   | Med23 | Ppp2r2d | Psmc4  | Uba2    | Dctn3  |
| RPE 0 h-1  | 0.688  | 0.090    | -0.632 | -0.731 | 1.836 | 7.727   | -2.012 | -0.008  | -1.955 |
| RPE 0 h-3  | 0.785  | -0.274   | -0.609 | -0.427 | 1.750 | 6.766   | -1.814 | 0.114   | -1.714 |
| RPE 0 h-4  | 0.929  | -0.168   | -0.517 | -0.379 | 1.446 | 7.205   | -1.838 | 0.039   | -1.857 |
| RPE 6 h-1  | 0.392  | 0.114    | -0.719 | -1.046 | 1.610 | 5.880   | -1.784 | -0.177  | -1.932 |
| RPE 6 h-2  | 0.220  | -0.063   | -0.770 | -0.839 | 1.323 | 4.997   | -1.723 | -0.212  | -1.798 |
| RPE 6 h-3  | 0.230  | -0.087   | -0.786 | -0.826 | 1.229 | 5.134   | -1.853 | -0.074  | -1.703 |
| RPE 6 h-4  | 0.339  | -0.006   | -0.674 | -0.736 | 1.519 | 5.508   | -1.643 | -0.238  | -1.661 |
| RPE 12 h-2 | 0.099  | -0.031   | -0.845 | -0.763 | 1.326 | 5.075   | -1.509 | -0.404  | -1.579 |
| RPE 12 h-3 | -0.018 | -0.012   | -0.765 | -0.669 | 1.486 | 5.331   | -1.453 | -0.274  | -1.633 |
| RPE 12 h-4 | -0.021 | -0.011   | -0.920 | -0.864 | 1.589 | 5.370   | -1.701 | -0.623  | -1.641 |
| RPE 18 h-1 | 0.123  | -0.144   | -0.808 | -0.897 | 1.254 | 5.098   | -1.753 | -0.333  | -1.814 |
| RPE 18 h-2 | -0.016 | -0.137   | -0.820 | -0.836 | 1.333 | 5.045   | -1.764 | -0.247  | -1.875 |
| RPE 18 h-3 | 0.056  | -0.148   | -0.902 | -0.885 | 1.272 | 5.119   | -1.789 | -0.367  | -1.835 |
| RPE 18 h-4 | -0.236 | -0.333   | -1.000 | -0.704 | 0.941 | 4.688   | -1.529 | -0.366  | -1.616 |
| RPE 24 h-1 | 0.332  | -0.313   | -0.689 | -0.987 | 1.018 | 5.264   | -2.020 | -0.084  | -2.041 |
| RPE 24 h-2 | 0.180  | -0.332   | -0.673 | -0.884 | 1.193 | 5.581   | -2.224 | -0.142  | -2.515 |
| RPE 24 h-3 | 0.075  | -0.104   | -0.609 | -0.888 | 1.119 | 4.503   | -2.059 | -0.151  | -2.323 |

30

31

32 **Table S6.** PMI estimates from multiple linear regression modeling.

|             |        |        |        |        |        |
|-------------|--------|--------|--------|--------|--------|
| Retina      | 0 h    | 6 h    | 12 h   | 18 h   | 24 h   |
| replicate 1 | 1.406  | -0.120 | 2.464  | 11.293 | 9.373  |
| replicate 2 | 8.566  | 4.510  | 11.652 | 19.738 | 21.435 |
| replicate 3 | -3.796 | -5.155 | 21.894 | 16.943 | 22.080 |
| replicate 4 | -6.075 | 24.656 |        | 23.967 | 43.128 |
| mean        | 0.025  | 5.973  | 12.003 | 17.985 | 24.004 |
| StDev       | 6.498  | 13.066 | 9.720  | 5.314  | 14.025 |
|             |        |        |        |        |        |
| RPE         | 0 h    | 6 h    | 12 h   | 18 h   | 24 h   |
| replicate 1 | -4.091 | -2.060 | 12.853 | 11.669 | 21.898 |
| replicate 2 | 3.381  | 11.819 | 12.708 | 20.617 | 23.244 |
| replicate 3 | 0.744  | 10.471 | 10.249 | 16.093 | 26.787 |
| replicate 4 |        | 3.865  |        | 23.983 |        |
| mean        | 0.011  | 6.024  | 11.937 | 18.091 | 23.976 |
| StDev       | 3.790  | 6.413  | 1.464  | 5.364  | 2.525  |

33

34 **Table S7.** Number of GO term overlaps by species.

|                                        | <b>0 h - 6 h</b>  | <b>0 h - 6 h</b> | <b>0 h - 6 h</b> | <b>0 h - 24 h</b> | <b>0 h - 24 h</b> | <b>0 h - 24 h</b> |
|----------------------------------------|-------------------|------------------|------------------|-------------------|-------------------|-------------------|
|                                        | <b>Biological</b> | <b>Cellular</b>  | <b>Molecular</b> | <b>Biological</b> | <b>Cellular</b>   | <b>Molecular</b>  |
|                                        | <b>Process</b>    | <b>Component</b> | <b>Function</b>  | <b>Process</b>    | <b>Component</b>  | <b>Function</b>   |
| <b>Retina</b><br><b>preserved</b>      | 97                | 36               | 18               | 133               | 25                | 21                |
| <b>Retina</b><br><b>degraded</b>       | 153               | 34               | 16               | 148               | 24                | 31                |
| <b>RPE/choroid</b><br><b>preserved</b> | 27                | 10               | 24               | 60                | 20                | 11                |
| <b>RPE/choroid</b><br><b>degraded</b>  | 46                | 12               | 13               | 143               | 5                 | 39                |

35

36

37 **Table S8.** Number of GO term overlaps by tissue.

|                                   | <b>0 h - 6 h</b>  | <b>0 h - 6 h</b> | <b>0 h - 6 h</b> | <b>0 h - 24 h</b> | <b>0 h - 24 h</b> | <b>0 h - 24 h</b> |
|-----------------------------------|-------------------|------------------|------------------|-------------------|-------------------|-------------------|
|                                   | <b>Biological</b> | <b>Cellular</b>  | <b>Molecular</b> | <b>Biological</b> | <b>Cellular</b>   | <b>Molecular</b>  |
|                                   | <b>Process</b>    | <b>Component</b> | <b>Function</b>  | <b>Process</b>    | <b>Component</b>  | <b>Function</b>   |
| <b>Mouse</b><br><b>preserved</b>  | 210               | 68               | 68               | 57                | 20                | 20                |
| <b>Mouse</b><br><b>degraded</b>   | 232               | 48               | 65               | 87                | 1                 | 16                |
| <b>Baboon</b><br><b>preserved</b> | 241               | 53               | 33               | 356               | 110               | 61                |
| <b>Baboon</b><br><b>degraded</b>  | 257               | 84               | 49               | 313               | 90                | 87                |

38

39 **Table S9.** GO term enrichment on cross-tissue and -species preserved and degraded genes

| <b>Degraded</b>  | <b>Biological process</b>                                                   | <b>Fold Enrichment</b> |
|------------------|-----------------------------------------------------------------------------|------------------------|
| GO:0007628       | adult walking behavior                                                      | 18.3430127             |
| GO:0006486       | protein glycosylation                                                       | 6.953560372            |
| GO:0006351       | transcription, DNA-templated                                                | 1.777601899            |
| GO:0035108       | limb morphogenesis                                                          | 44.32894737            |
| GO:0033962       | cytoplasmic mRNA processing body assembly                                   | 29.55263158            |
| GO:0089711       | L-glutamate transmembrane transport                                         | 27.27935223            |
|                  | posttranscriptional regulation of gene expression                           |                        |
| GO:0010608       |                                                                             | 25.33082707            |
|                  | dolichol-linked oligosaccharide biosynthetic process                        |                        |
| GO:0006488       |                                                                             | 23.64210526            |
| GO:0042073       | intraciliary transport                                                      | 22.16447368            |
| GO:0045776       | negative regulation of blood pressure                                       | 19.70175439            |
| <b>Degraded</b>  | <b>Cellular component</b>                                                   | <b>Fold Enrichment</b> |
| GO:0005634       | nucleus                                                                     | 1.298122353            |
| GO:0032587       | ruffle membrane                                                             | 6.744484431            |
| <b>Degraded</b>  | <b>Molecular Function</b>                                                   | <b>Fold Enrichment</b> |
|                  | transferase activity, transferring alkyl or aryl (other than methyl) groups |                        |
| GO:0016765       |                                                                             | 115.4786325            |
|                  | dolichyl-phosphate-glucose-glycolipid alpha-glucosyltransferase activity    |                        |
| GO:0004583       |                                                                             | 86.60897436            |
| GO:0046872       | metal ion binding                                                           | 1.734106272            |
| GO:0003677       | DNA binding                                                                 | 1.79235128             |
|                  | L-glutamate transmembrane transporter activity                              |                        |
| GO:0005313       |                                                                             | 31.49417249            |
|                  | thiol-dependent ubiquitin-specific protease activity                        |                        |
| GO:0004843       |                                                                             | 7.118545838            |
| GO:0019904       | protein domain specific binding                                             | 3.87079215             |
| <b>Preserved</b> | <b>Biological process</b>                                                   | <b>Fold Enrichment</b> |
| GO:0035556       | intracellular signal transduction                                           | 7.924728021            |
|                  | positive regulation of transcription from RNA polymerase II promoter        |                        |
| GO:0045944       |                                                                             | 4.421840137            |
| GO:0060716       | labyrinthine layer blood vessel development                                 | 74.65927978            |
|                  | negative regulation of transcription from RNA polymerase II promoter        |                        |
| GO:0000122       |                                                                             | 4.74423517             |
| GO:0045597       | positive regulation of cell differentiation                                 | 42.98564593            |
| GO:0032870       | cellular response to hormone stimulus                                       | 39.40350877            |
| GO:0051591       | response to cAMP                                                            | 36.37246964            |
| GO:0071277       | cellular response to calcium ion                                            | 30.8375286             |
| GO:0009612       | response to mechanical stimulus                                             | 27.27935223            |
| GO:0001503       | ossification                                                                | 23.25452977            |
|                  | regulation of transcription from RNA polymerase II promoter                 |                        |
| GO:0006357       |                                                                             | 5.797791481            |
| <b>Preserved</b> | <b>Cellular component</b>                                                   | <b>Fold Enrichment</b> |

*Tissue- and Species-Specific Patterns of RNA instability in Post-Mortem Mammalian Retina and RPE*

|                  |                                                  |                        |
|------------------|--------------------------------------------------|------------------------|
| GO:0031012       | extracellular matrix                             | 12.39689387            |
| GO:0016020       | membrane                                         | 2.266365214            |
| <b>Preserved</b> | <b>Molecular Function</b>                        | <b>Fold Enrichment</b> |
|                  | transcription factor activity, RNA polymerase II |                        |
|                  | core promoter proximal region sequence-          |                        |
| GO:0000982       | specific binding                                 | 75.06111111            |
|                  | RNA polymerase II core promoter proximal         |                        |
| GO:0000978       | region sequence-specific DNA binding             | 8.562103929            |

40

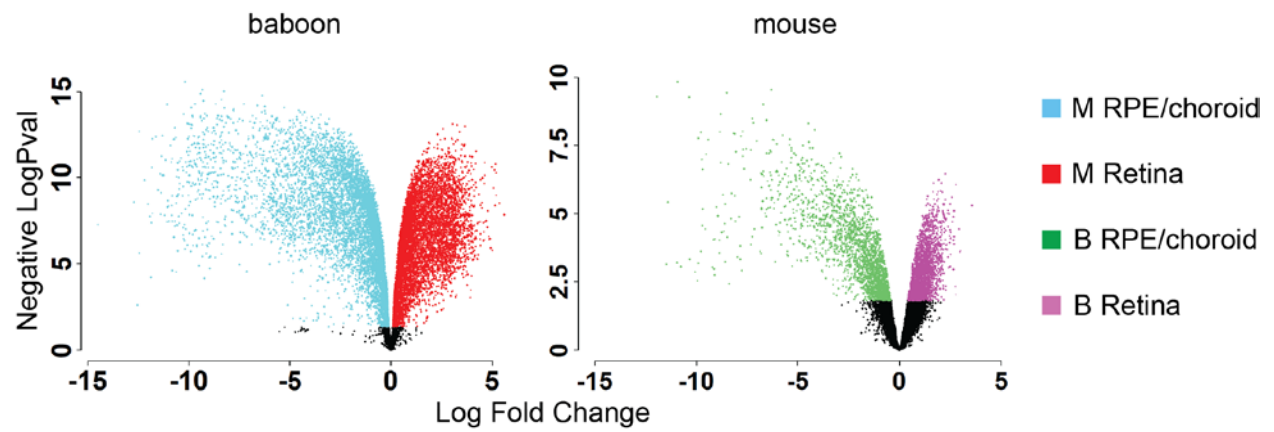

41

42 **Figure S1.** Volcano plots of retina vs RPE/choroid for M = mouse and B = baboon. Black dots  
43 represent genes not statistically differentially expressed.

44

45

46

47

48

49

50

51

52

53

54

55

56

57

58

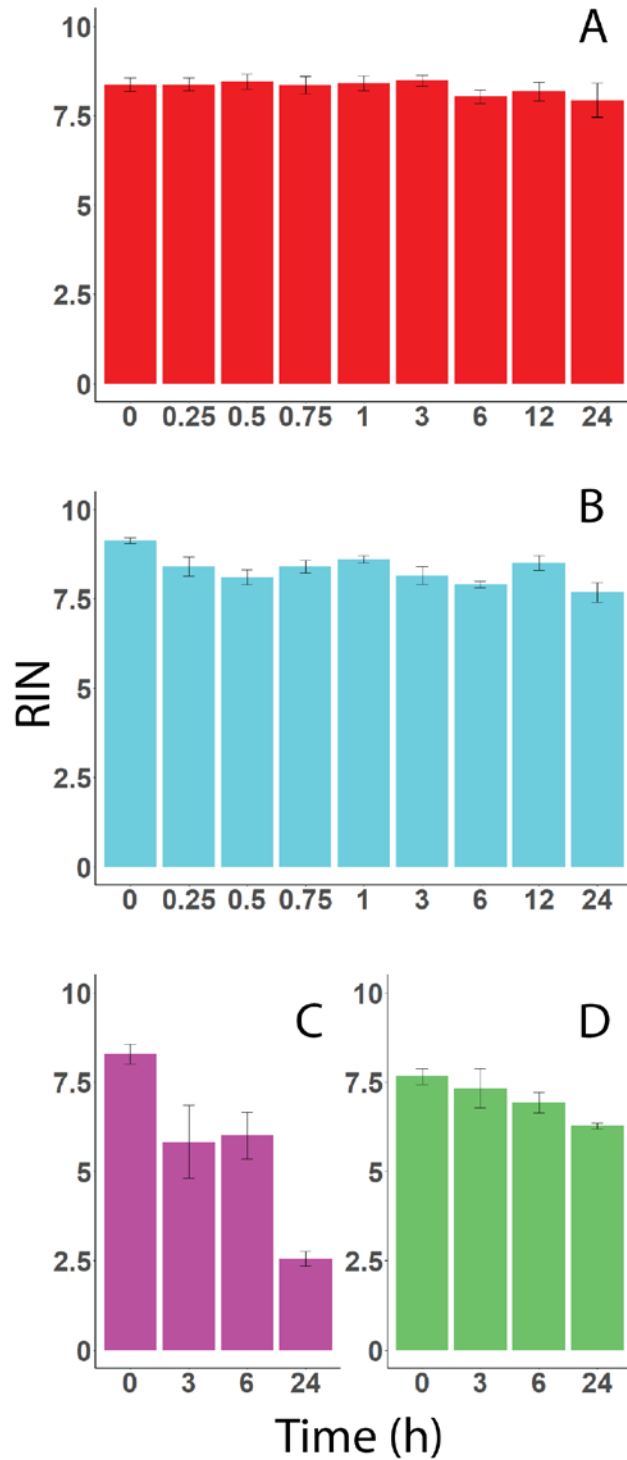

59

60 **Figure S2.** RNA integrity numbers (RINs). A). Mouse retina B). Mouse RPE/choroid. C). Baboon  
61 retina. D). Baboon RPE/choroid.



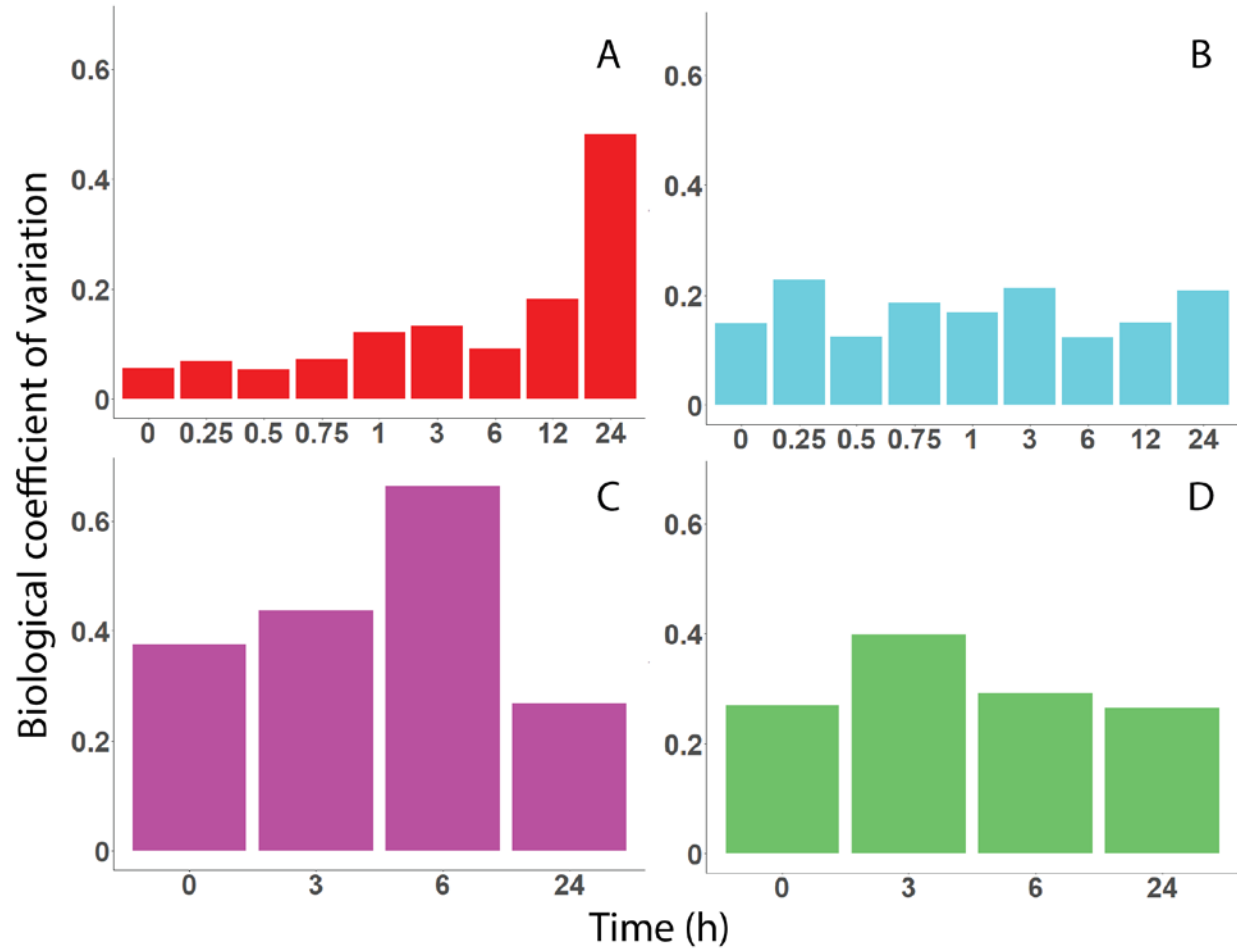

62

63 **Figure S3.** Biological coefficient of variation. A). Mouse retina B). Baboon retina C). Mouse  
64 RPE/choroid tissues. D). Baboon RPE/choroid tissues.

65

66

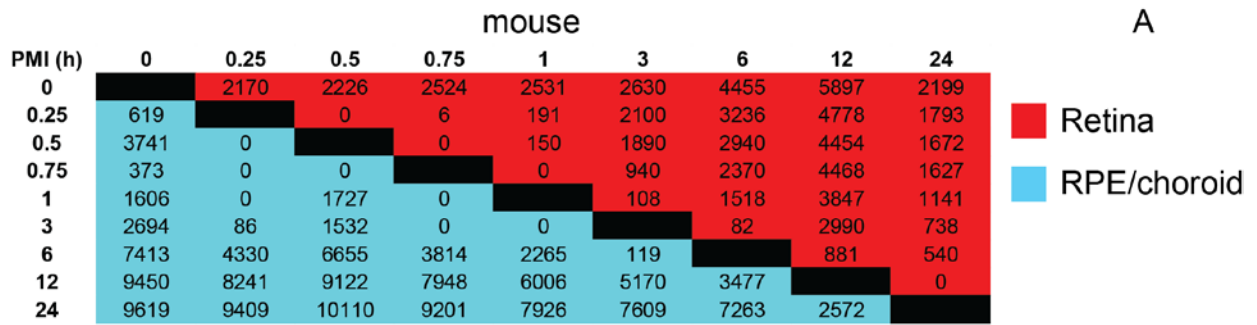

67

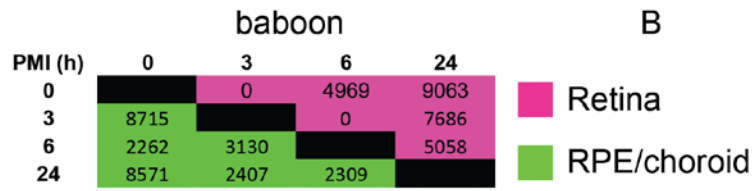

68 **Figure S4.** Number of differentially expressed genes between all tested PMIs. A). Mouse retina  
 69 and RPE/choroid. B). Baboon retina and RPE/choroid.

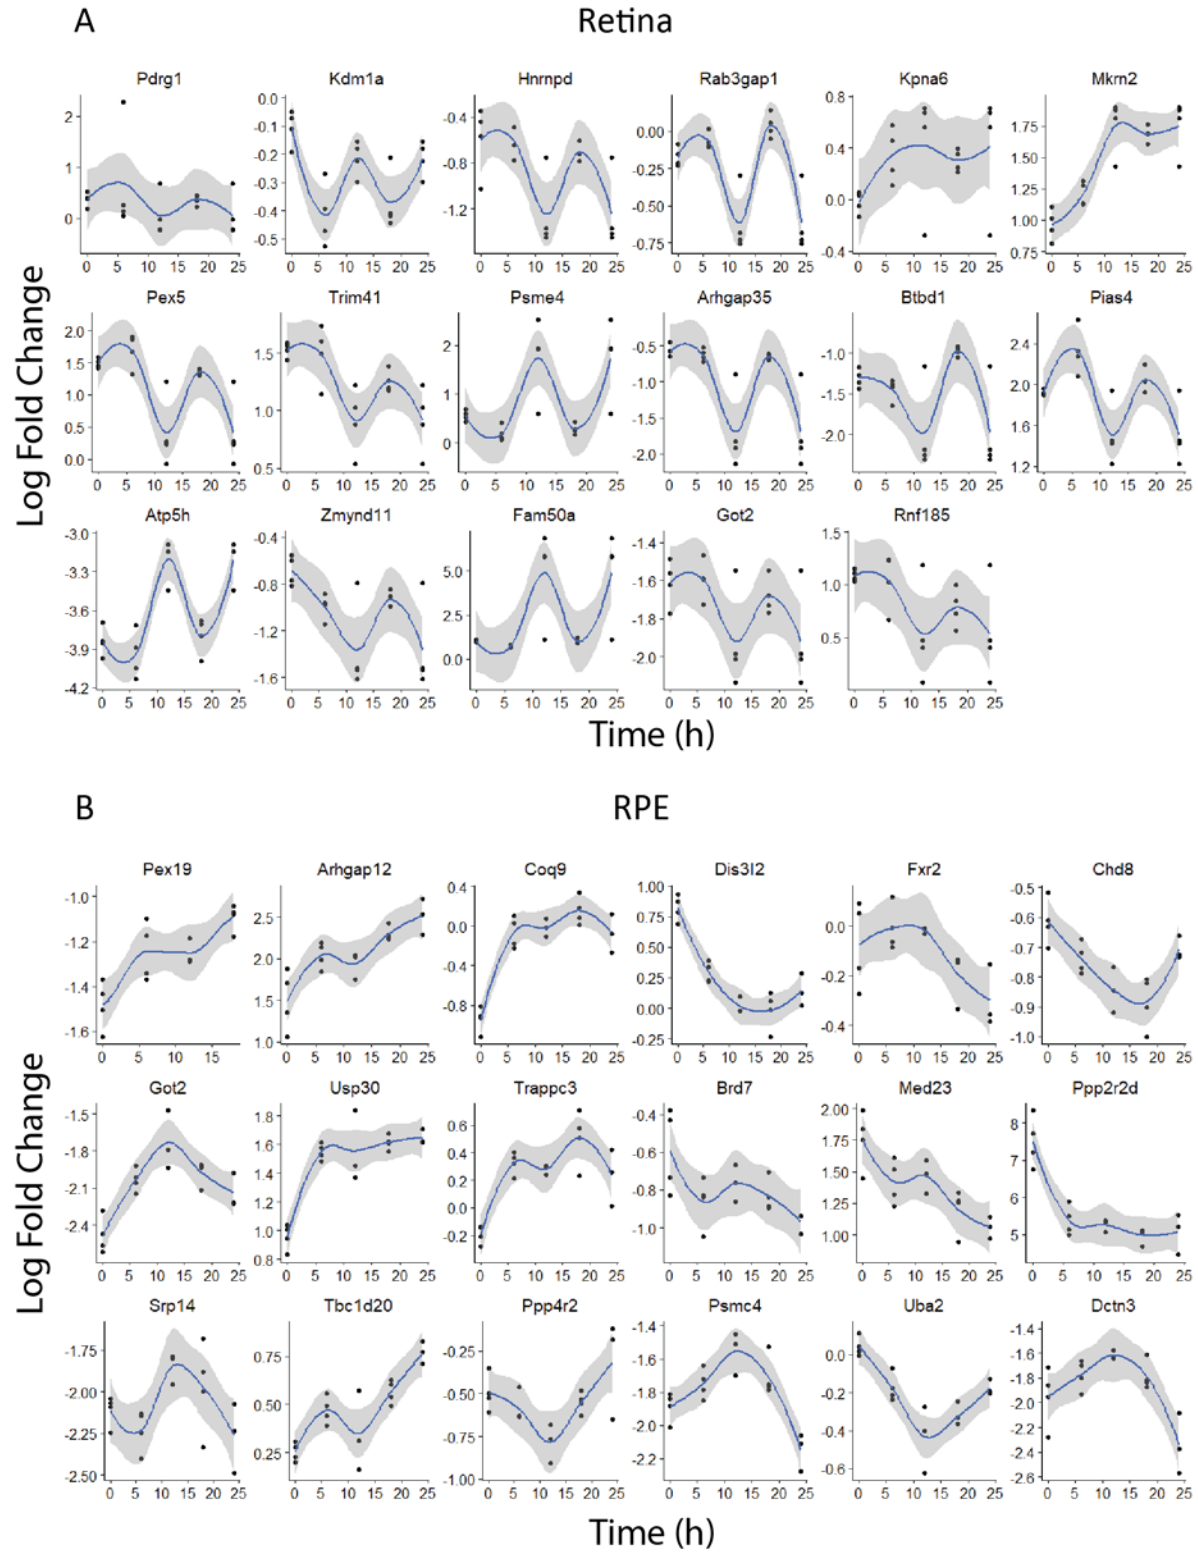

70

71 **Figure S5.** qRT-PCR results of selected mouse genes used for PMI modeling. A). Retina B).

72 RPE/choroid

73

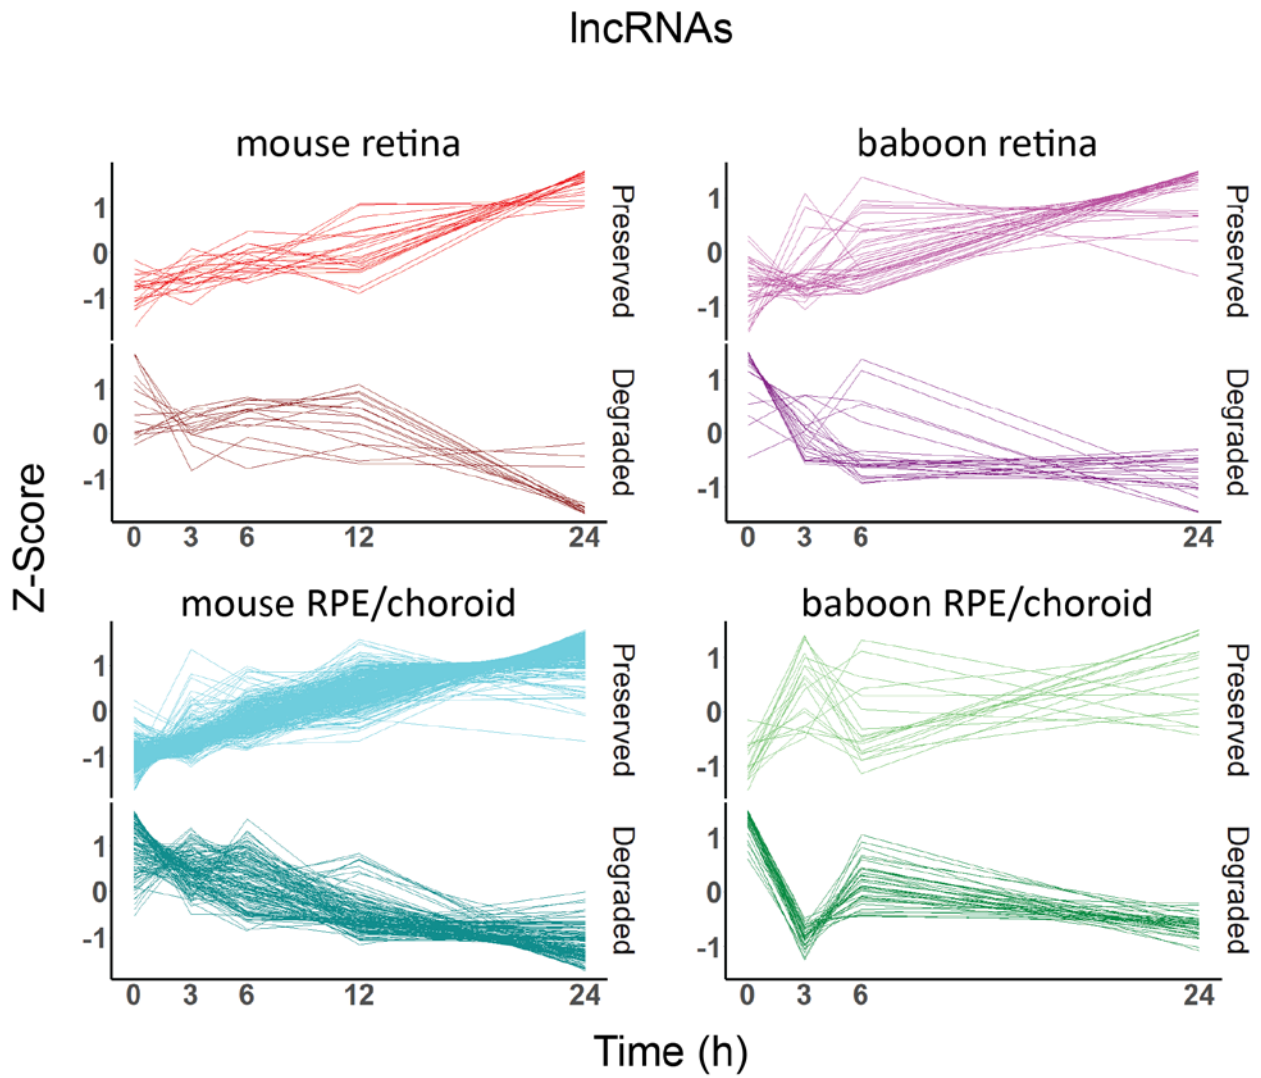

74

75

76 **Figure S6.** Z-Scores of preserved and degraded differentially expressed lncRNAs.

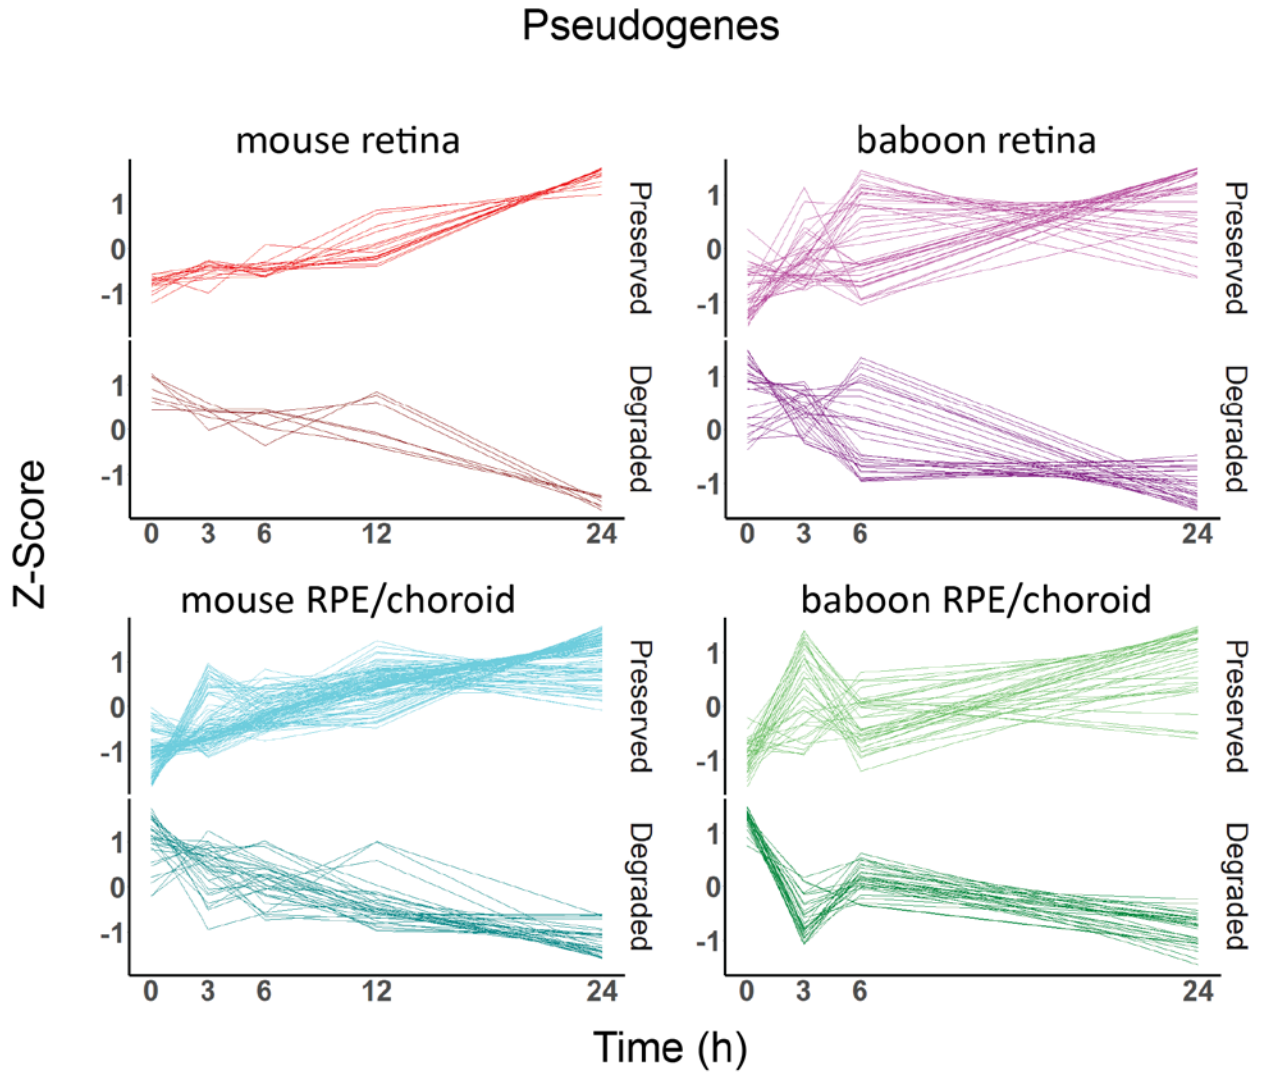

77

78

79 **Figure S7.** Z-Scores of preserved and degraded differentially expressed pseudogenes.

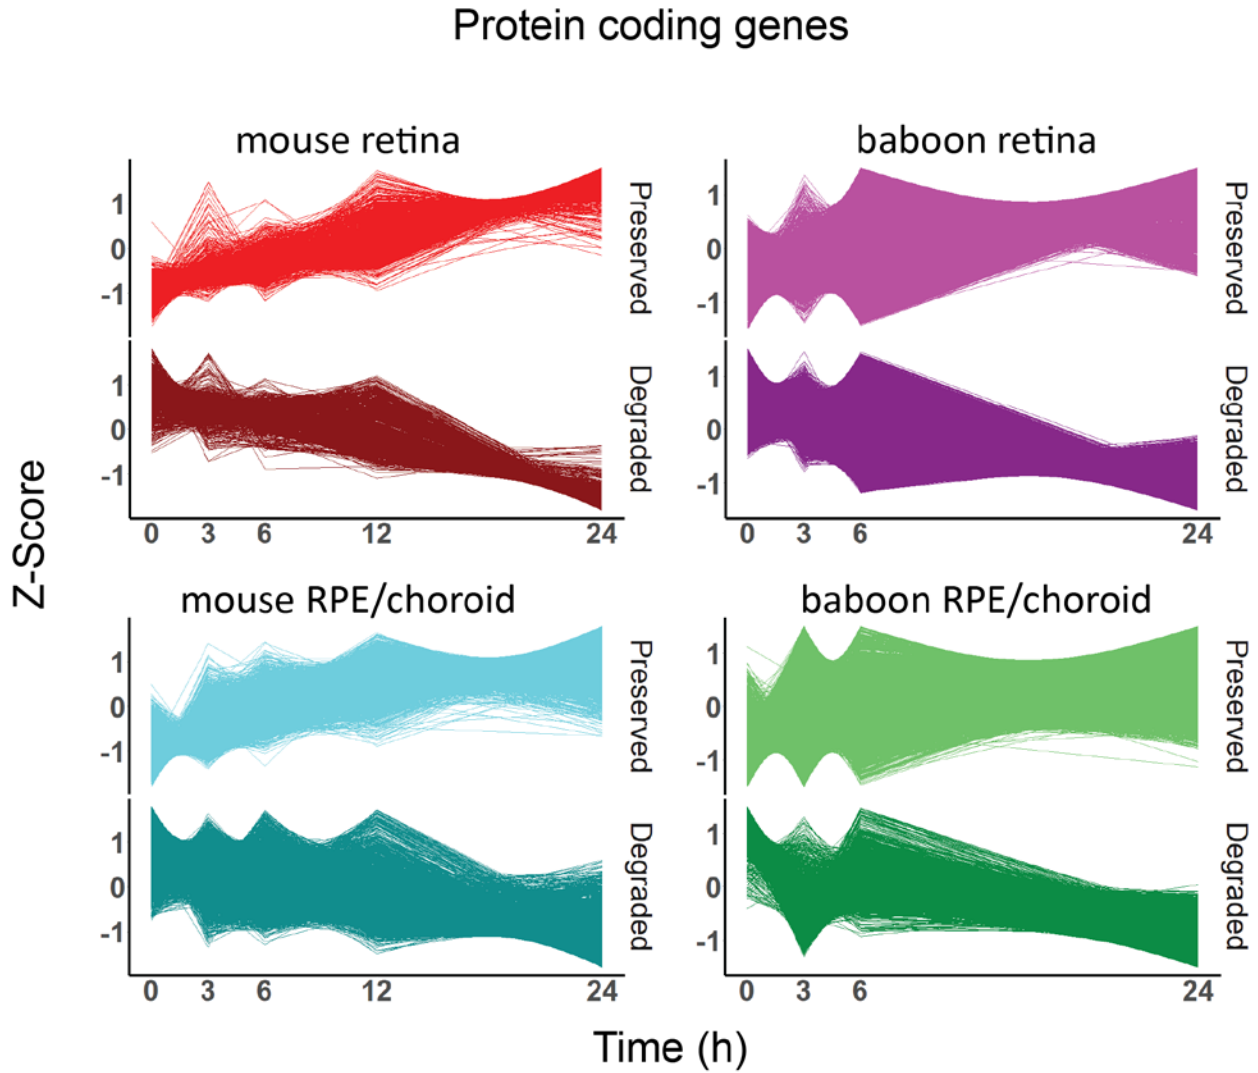

80

81

82 **Figure S8.** Z-Scores of preserved and degraded differentially expressed protein coding genes.

83
